# Supplementary material
Source: PubMed Central journal article supplement (PMC3812937)
Supplement: NIHMS505433-supplement-505433.pdf [file NIHMS505433-supplement-505433.pdf]

## Supplementary Information

**Table S1.** Sperm Motility Parameters for Selected Spermatozoa.

| Sperm | Average Path Velocity<br>(VAP) | Straight Line Velocity<br>(VSL) | Straightness<br>(VSL/VAP) |
|-------|--------------------------------|---------------------------------|---------------------------|
| H1    | 69.10                          | 57.14                           | 0.83                      |
| H2    | 85.19                          | 66.07                           | 0.78                      |
| H3    | 19.95                          | 13.57                           | 0.68                      |
| H4    | 21.56                          | 17.86                           | 0.83                      |
| H5    | 36.82                          | 17.86                           | 0.48                      |
| H6    | 67.36                          | 61.43                           | 0.91                      |
| H7    | 21.61                          | 14.29                           | 0.66                      |
| H8    | 26.33                          | 18.57                           | 0.71                      |
| H9    | 80.05                          | 65.36                           | 0.82                      |
| H10   | 29.57                          | 8.57                            | 0.29                      |
| V1    | 90.03                          | 75.00                           | 0.83                      |
| V2    | 86.75                          | 67.86                           | 0.78                      |
| V3    | 47.76                          | 39.29                           | 0.82                      |
| V4    | 92                             | 66.07                           | 0.71                      |
| V5    | 28.72                          | 22.14                           | 0.77                      |
| V6    | 55.31                          | 45.71                           | 0.83                      |
| V7    | 37.09                          | 23.57                           | 0.64                      |
| V8    | 69.9                           | 57.50                           | 0.82                      |
| V9    | 41.50                          | 19.29                           | 0.46                      |
| V10   | 53.18                          | 10.71                           | 0.20                      |
